# Supplementary material for: A solar ultraviolet sensor based on fluorescent polyoxometalate and viologen
Source: Royal Society of Chemistry journal article supplement (doi:10.1039/c7tc01263b), 2017-01-01
Supplement: c7tc01263b1.pdf [file c7tc01263b1.pdf]

## *Electronic Supplementary Information*

### **Solar ultraviolet sensor based on fluorescent polyoxometalate and viologen**

Hong Liu,<sup>a,b</sup> Yang Lv,<sup>b</sup> Si Li,<sup>b</sup> Fan Yang,<sup>b</sup> Sheng Liu,<sup>b</sup> Cheng Wang,<sup>\*c</sup> Jia-Qi Sun,<sup>b</sup> Hao Meng,<sup>b</sup> and Guang-Gang Gao<sup>\*a,b</sup>

<sup>a</sup> *School of Material Science and Engineering, University of Jinan, Jinan 250022, P. R. China*

<sup>b</sup> *College of Pharmacy, Jiamusi University, Jiamusi 154007, P. R. China*

<sup>c</sup> *Key Laboratory of Functional Inorganic Material Chemistry, Heilongjiang University, Harbin 150080, P. R. China*

\*Corresponding authors: gaogg@jmsu.edu.cn (Dr. Prof. G. G. Gao)  
wangc\_93@163.com (Dr. Prof. C. Wang)

## Synthesis of EuW<sub>10</sub>

EuW<sub>10</sub> was synthesized according to literature method.<sup>[1]</sup> Na<sub>2</sub>WO<sub>4</sub>·2H<sub>2</sub>O (8.3 g, 25.2 mmol) was dissolved in 20 ml of water and the solution pH was adjusted to 7.3 with CH<sub>3</sub>COOH. An aqueous solution (2 ml) containing EuCl<sub>3</sub>·6H<sub>2</sub>O (0.91 g, 2.47 mmol) was added dropwise to the above-mentioned solution with stirring at 85 °C. Cooling the solution at room temperature yielded colorless crystals which were filtered off and dried in air.

## Synthesis of AV<sup>2+</sup>

AV<sup>2+</sup> was synthesized according to literature method.<sup>[2]</sup> A mixture of 4,4'-dipyridine (0.20 g, 1.3 mmol), 3-bromopropylamine hydrobromide (0.84 g, 3.8 mmol) and MeCN (7 ml) was heated under stirring vigorously at 80 °C for 12 hours. After cooling to room temperature, pale yellow powder was obtained and washed twice with acetonitrile (20 ml), and then dried under vacuum.

[1] M. Sugeta and T. Yamase, Bull. Chem. Soc. Jpn., 1993, **66**, 444-449.

[2] M. S. Simon and P. T. Moore, J. Polym. Sci., Part A: Polym. Chem., 1975, **13**, 1-16.

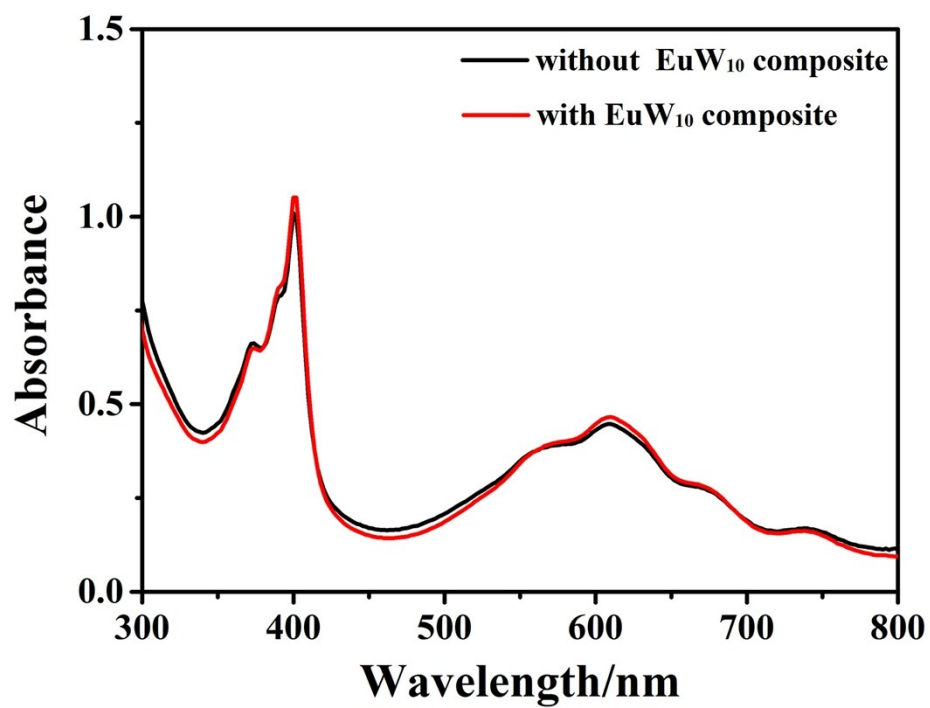

**Fig. S1** UV-vis spectra of colored composite films (red line, containing EuW<sub>10</sub>; black line, without EuW<sub>10</sub>).

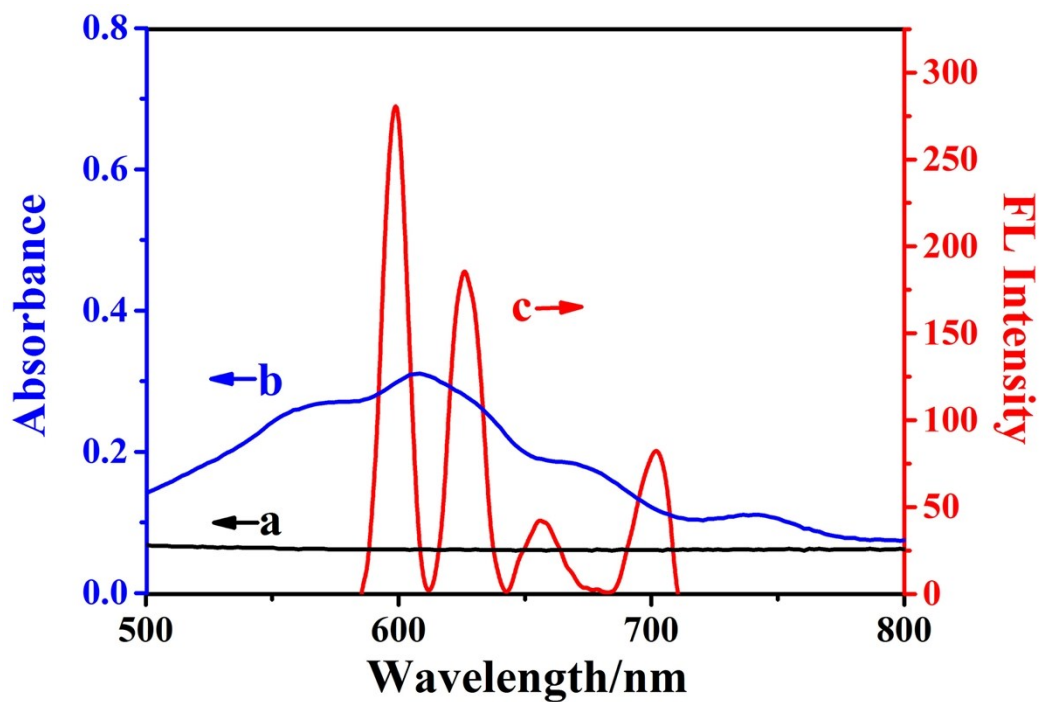

**Fig. S2** UV-vis spectra of the composite film before (a) and after (b) UV irradiation for 4 min. The emission spectrum of the composite film was detected upon 254 nm excitation (c).

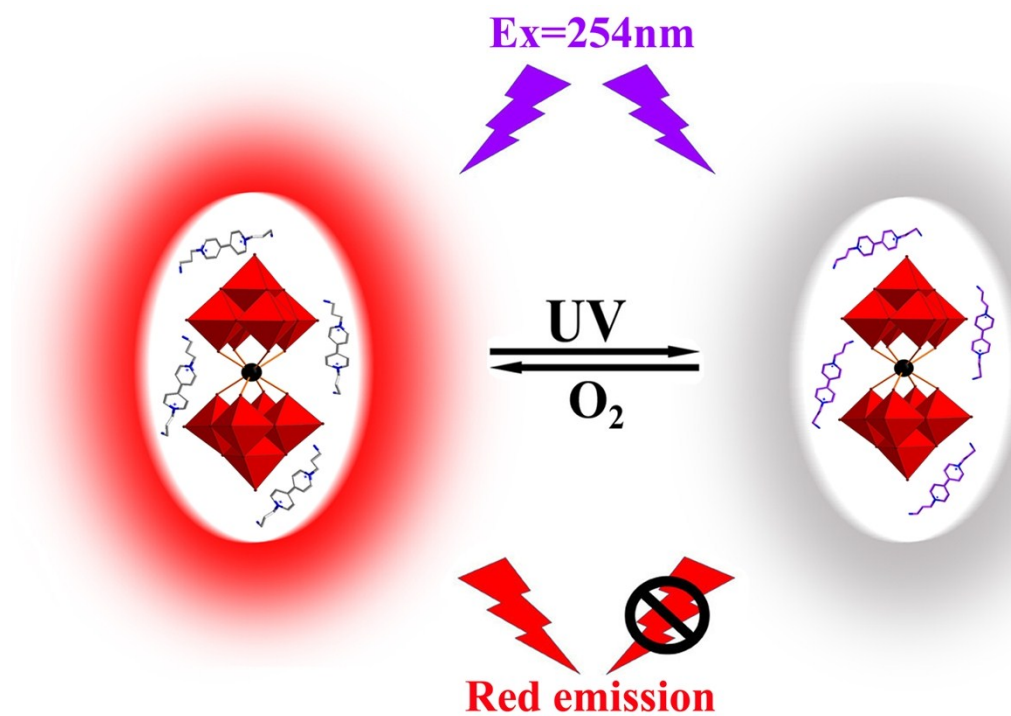

**Fig. S3** Illustration of the composite film containing  $\text{EuW}_{10}$  with  $\text{AV}^{2+}$  before (left) and after (right) UV irradiation and the reverse transformation under ambient conditions.

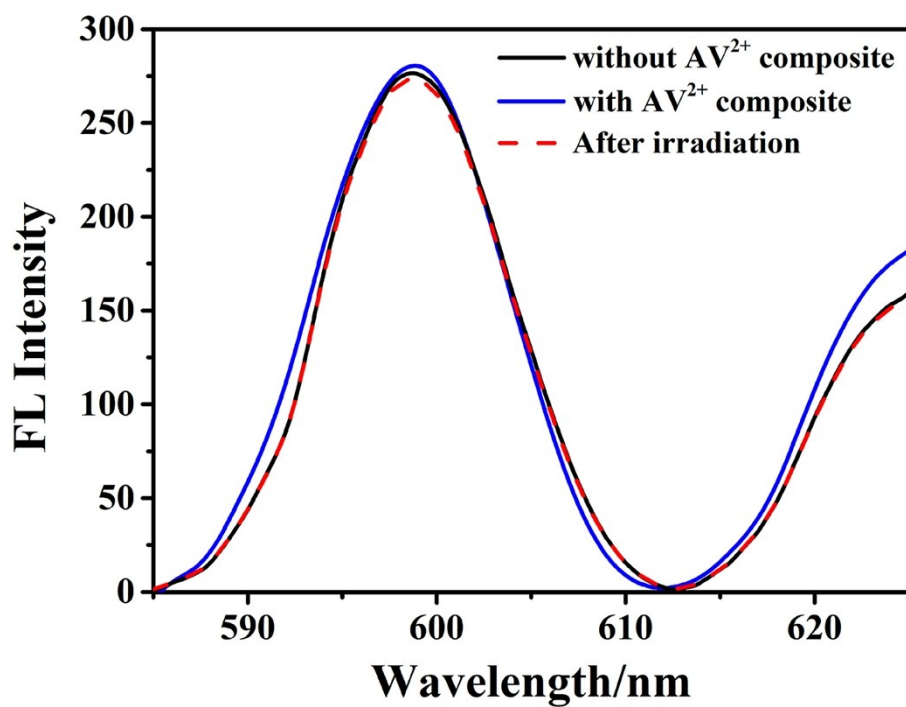

**Fig. S4** Emission spectra of the composite film with AV<sup>2+</sup> (blue line) and without AV<sup>2+</sup> (black line) before UV irradiation and without AV<sup>2+</sup> but upon UV irradiation for 4 min (dashed red line).

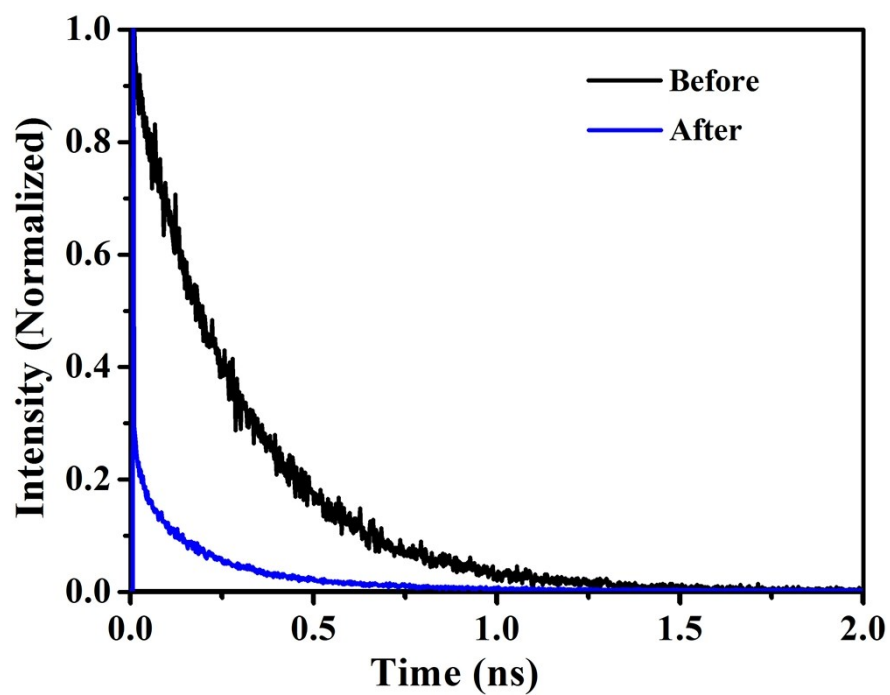

**Fig. S5** Fluorescence decay curves of the composite films before and after exposure to solar UV (at 2:30 pm) for 10 min.

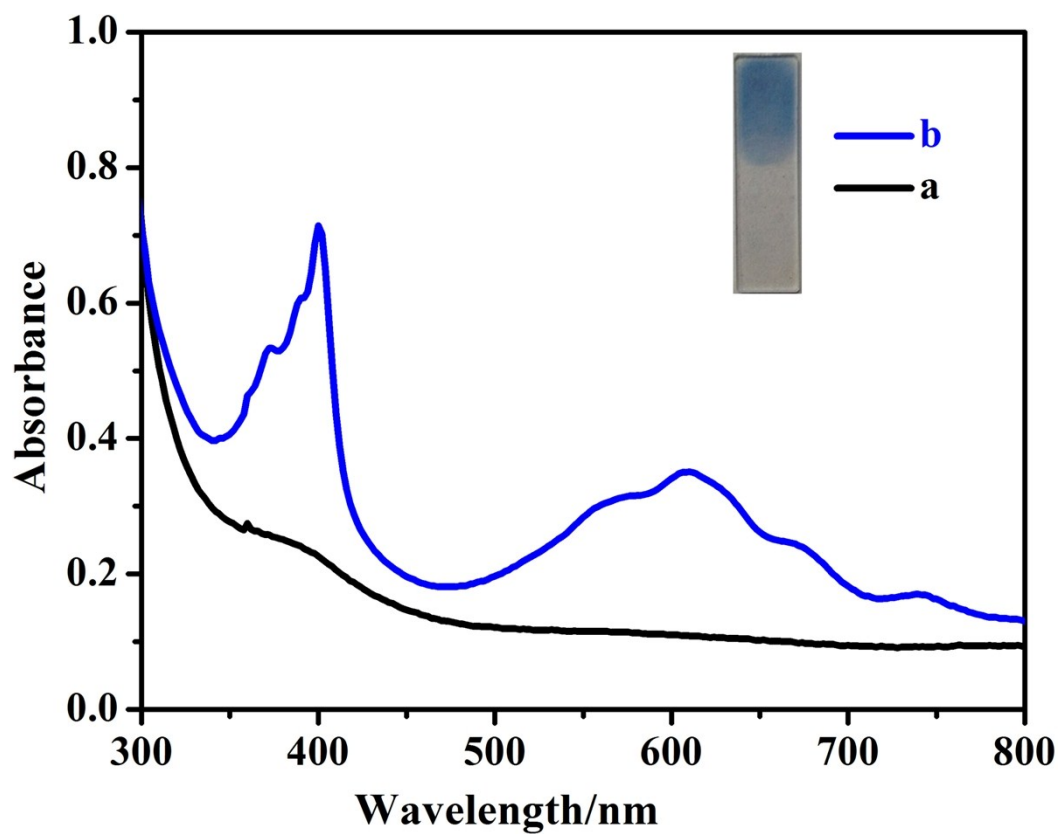

**Fig. S6** UV-vis spectra of the composite film after exposure to the sunlight (at 1:00 pm) for 10 min with (a) and without (b) UV filter. The inset shows the color change of the composite film in the sunlight, of which the bottom part is covered by UV filter.



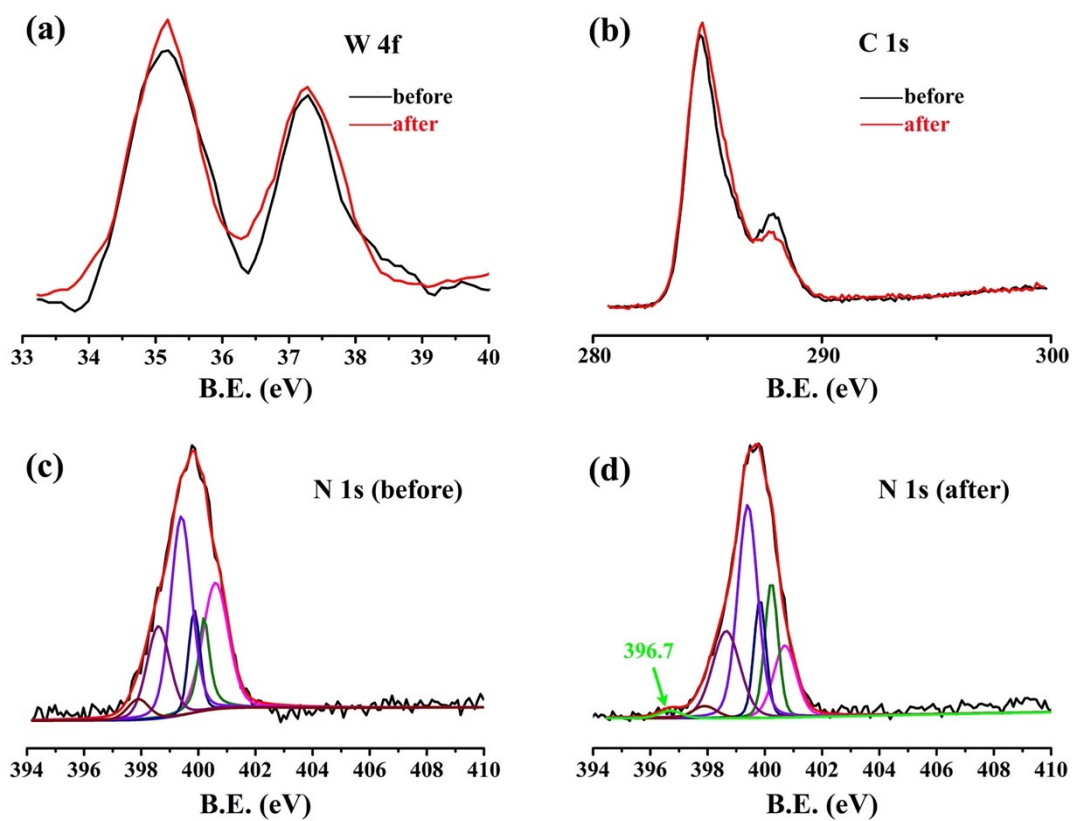

**Fig. S7** XPS core-level spectra of W 4f (a), C 1s (b) and N 1s (c, d) in the composite film before and after UV irradiation.

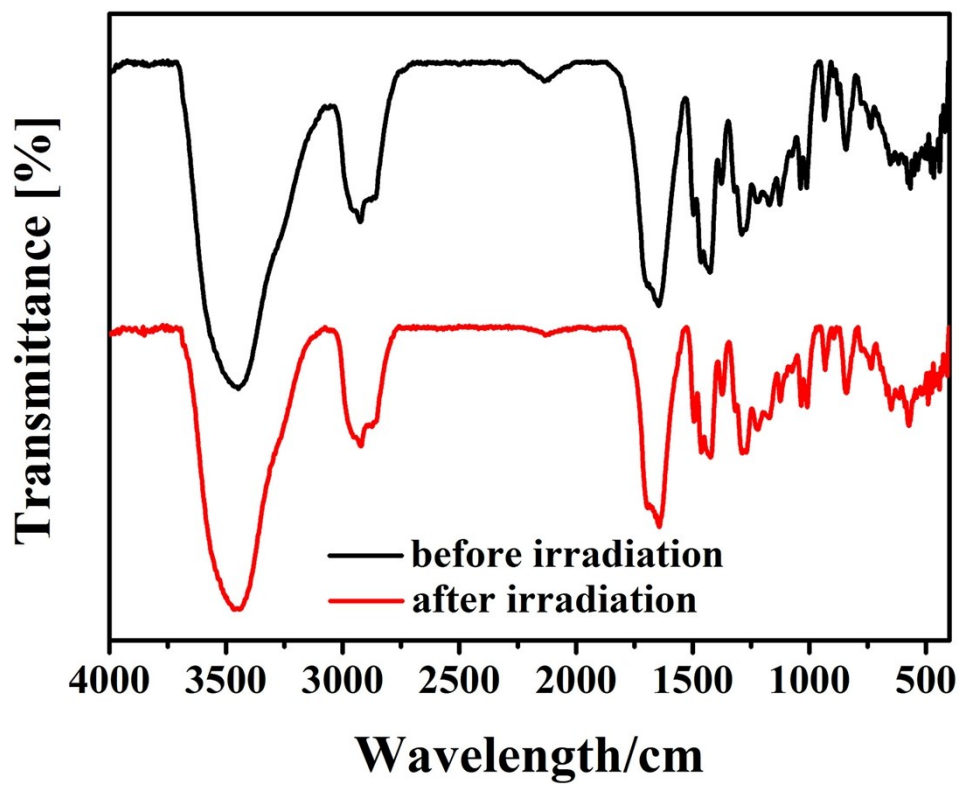

**Fig. S8** FTIR spectra of the composite film before (black) and after (red) UV irradiation at room temperature in air for 4 min.

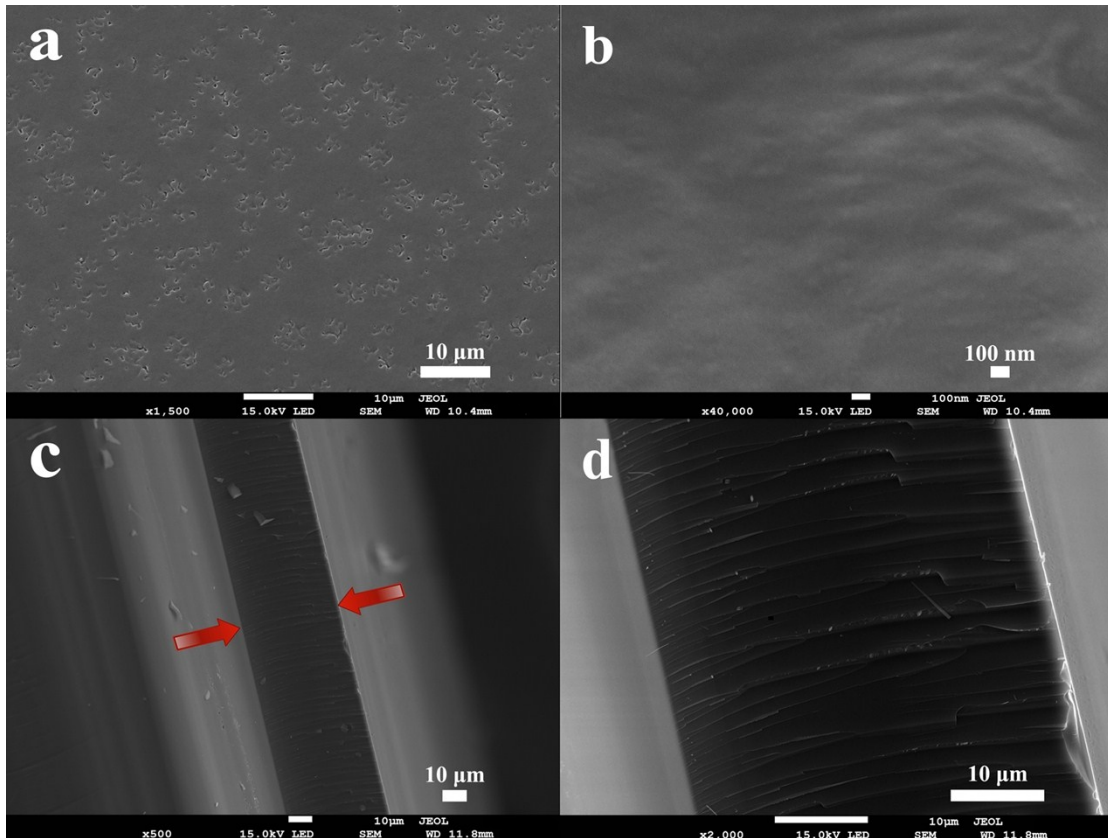

**Fig. S9** SEM images of the composite films at low (a and c) and high (b and d) magnification. The surface morphology is shown in (a) and (b), in which the black dots are caused by the electron beam damage. The surface is smooth without any obvious aggregation. SEM cross-sectional images of composite film are shown in (c) and (d), the thickness is ca. 42.67 μm in this batch, which can be tuned by adjusting the dropping volume or concentration of stock solution.

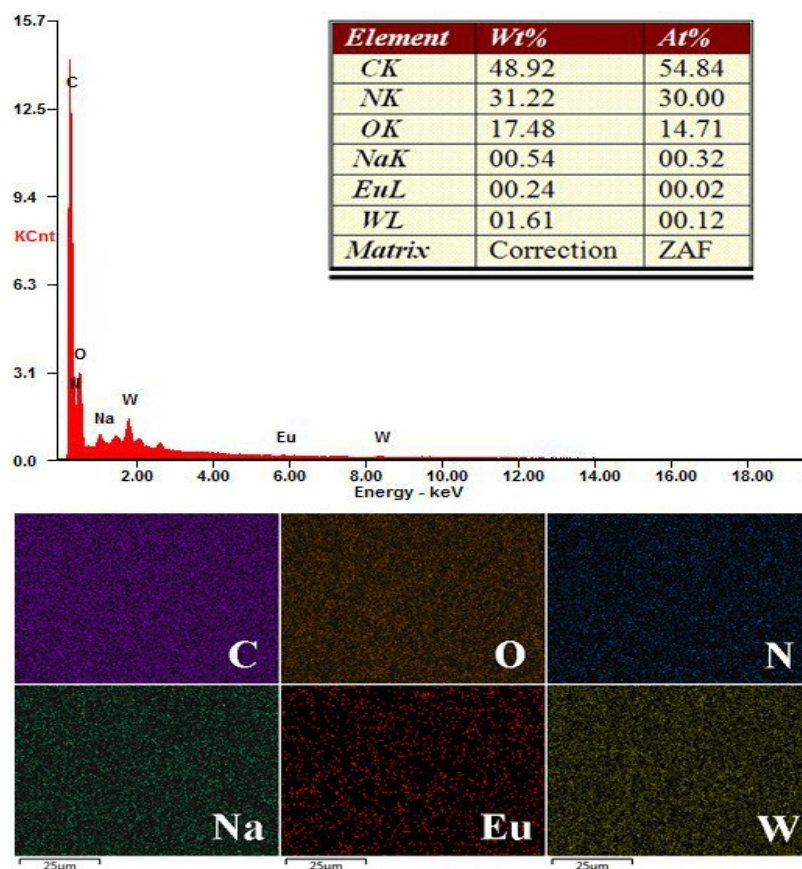

**Fig. S10** Energy dispersive X-ray spectra (EDS) analysis and mapping of each element of the composite film. Na, Eu, W, and partial O originate from  $\text{EuW}_{10}$ ; C, N, and partial O originate from polyvinylpyrrolidone, polyethyleneimine and  $\text{AV}^{2+}$ .

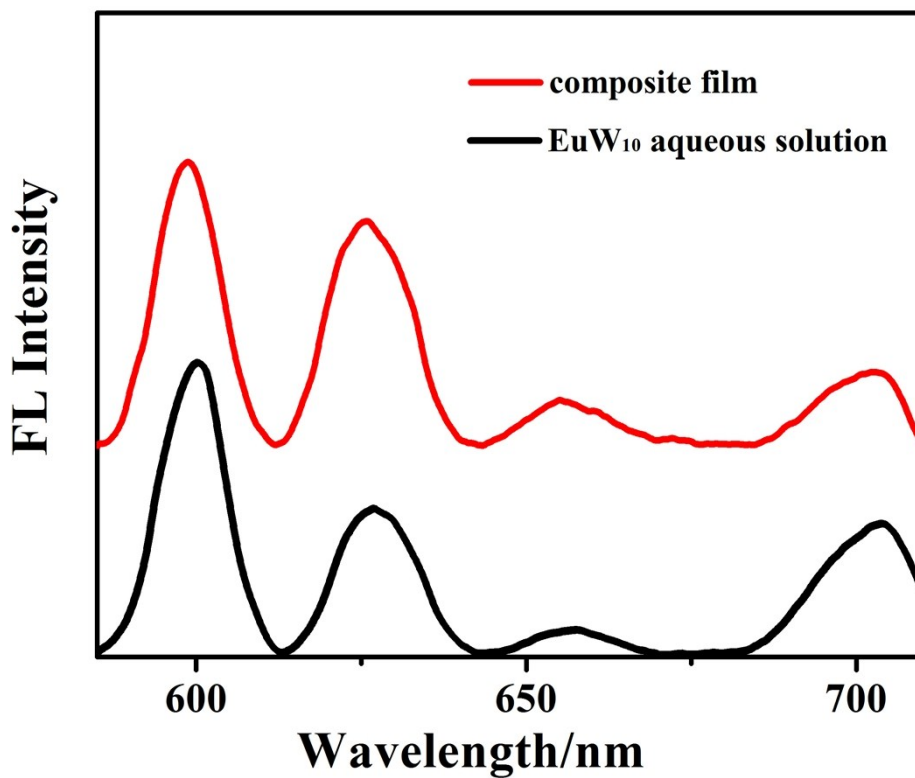

**Fig. S11** Emission spectra of the composite film (before UV irradiation) and EuW<sub>10</sub> aqueous solution (8 wt%).

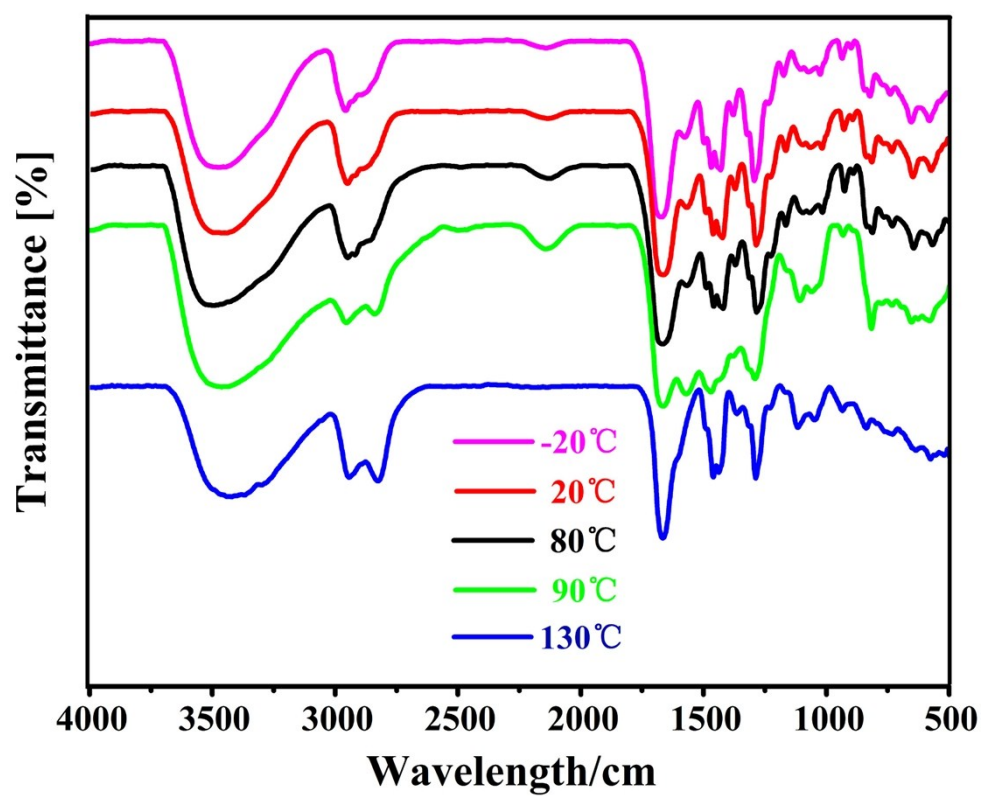

**Fig. S12** FTIR spectra of the composite films at different temperatures (The temperature has little effect on the photochromism of the film from -20 to 80 °C. However, the film suffers structural change when the temperature exceeds 80 °C).

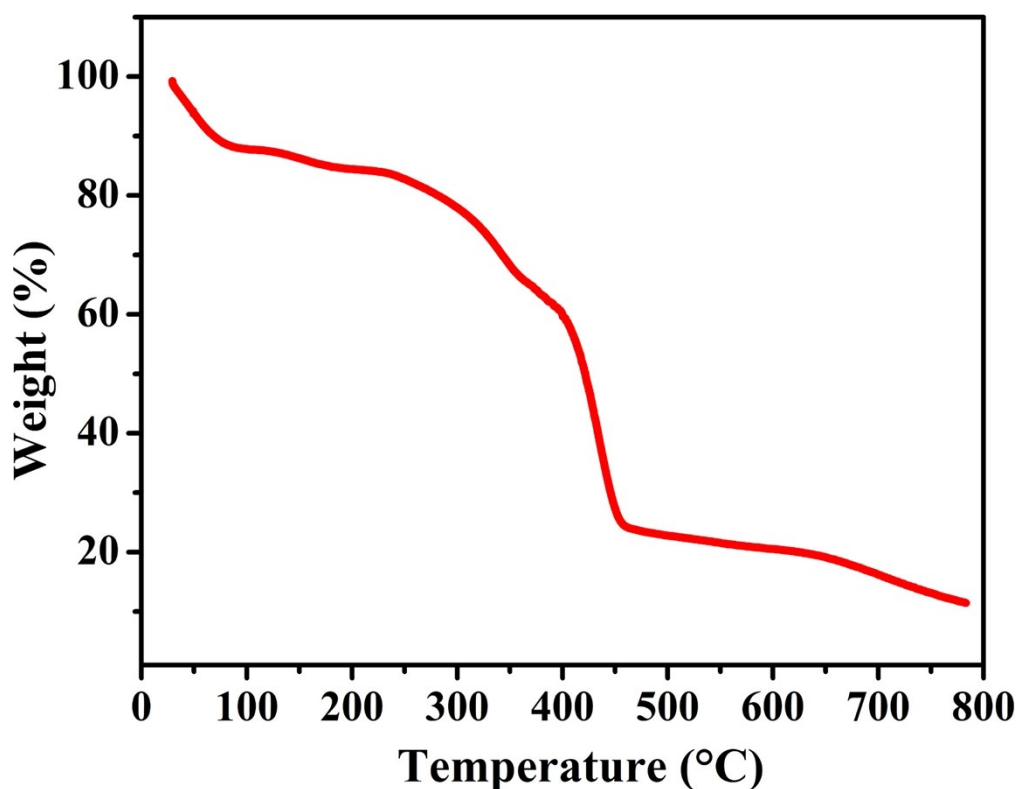

**Fig. S13** TGA curves of the composite film ( $10\text{ }^{\circ}\text{C min}^{-1}$  from room temperature to  $800\text{ }^{\circ}\text{C}$  under nitrogen atmosphere).

The weight losses are mainly divided into four parts. The temperature of  $25\text{ }^{\circ}\text{C}$  to  $86\text{ }^{\circ}\text{C}$ ,  $86\text{ }^{\circ}\text{C}$  to  $267\text{ }^{\circ}\text{C}$ ,  $267\text{ }^{\circ}\text{C}$  to  $450\text{ }^{\circ}\text{C}$ ,  $450\text{ }^{\circ}\text{C}$  to  $783\text{ }^{\circ}\text{C}$  correspond to the weight losses of 11%, 6%, 58% and 14%, respectively. An early weight loss from  $25\text{ }^{\circ}\text{C}$  to  $86\text{ }^{\circ}\text{C}$  may be due to the loss of free water molecules in the film. A consecutive steady weight loss from  $86\text{ }^{\circ}\text{C}$  to  $267\text{ }^{\circ}\text{C}$  may be due to the loss of small molecules or groups in PVP or PEI. A further weight loss from  $267\text{ }^{\circ}\text{C}$  to  $450\text{ }^{\circ}\text{C}$  is possibly caused by the loss of  $\text{AV}^{2+}$  and PVP. Then, the weight loss from  $450\text{ }^{\circ}\text{C}$  to  $783\text{ }^{\circ}\text{C}$  may be due to the loss of PEI and  $\text{EuW}_{10}$ .

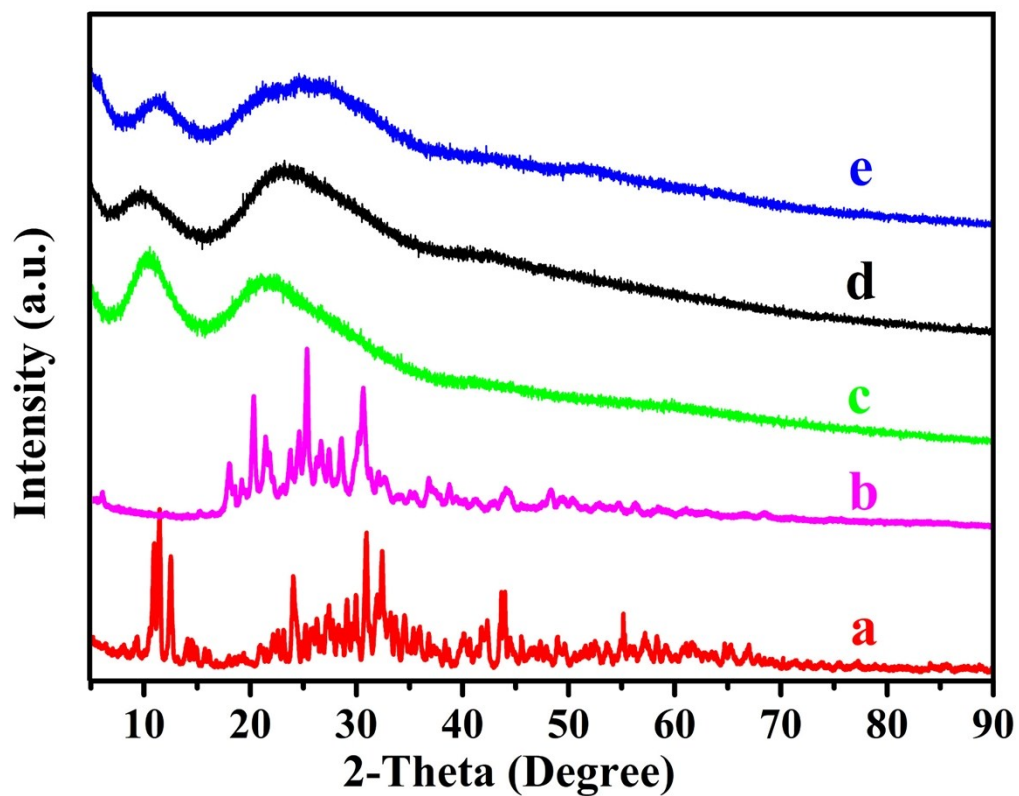

**Fig. S14** XRD patterns for: (a) EuW<sub>10</sub>; (b) AV<sup>2+</sup>; (c) the film containing PVP and PEI; the composite film before (d) and after (e) UV irradiation.



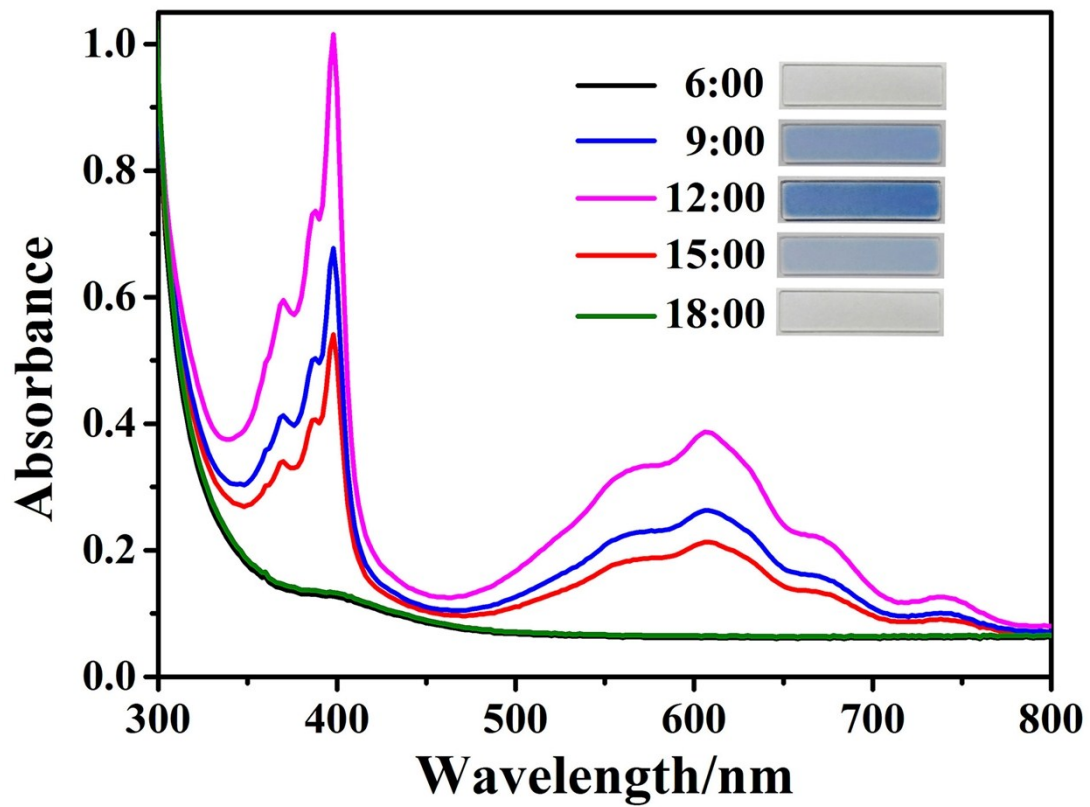

Fig. S15 UV-vis spectra of the composite film at different local time.

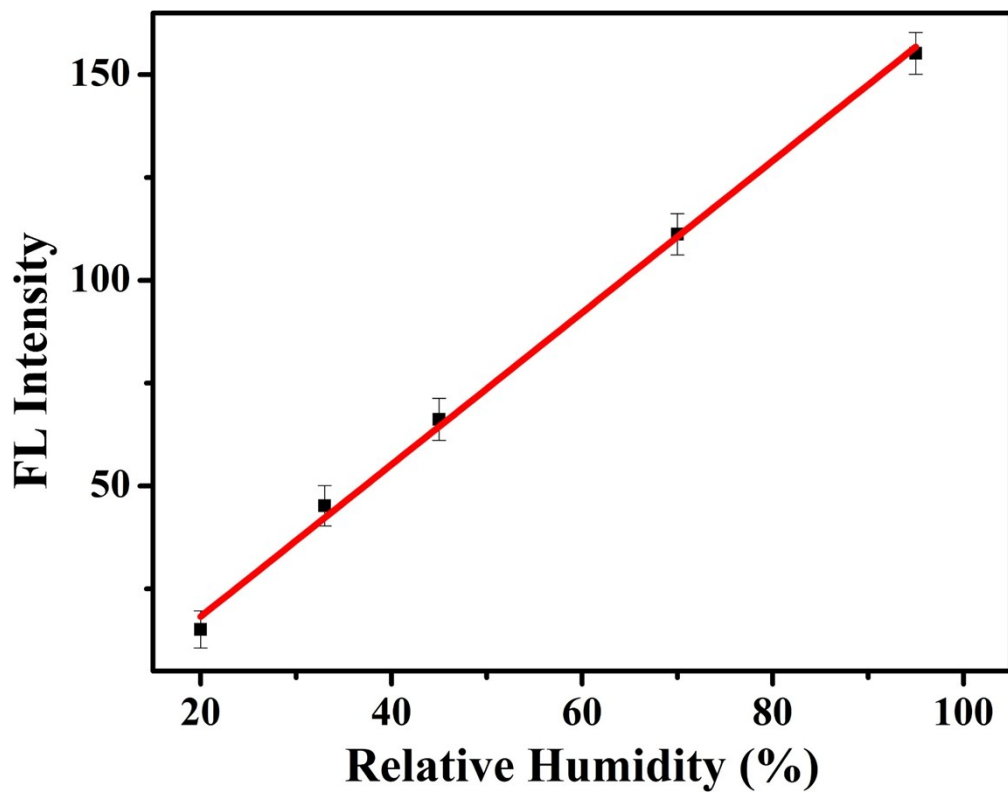

**Fig. S16** Plots of the emission intensity at 600 nm of the composite film after exposure to different RH (20%, 33%, 45%, 70% and 95%) for 4 min.

**Table S1** The fluorescence lifetimes of the composite films before and after exposure to solar UV (at 2:30 pm) for 10 min.

| State  | Excitation/nm | $\tau_1$ (ns) | $f_1$ (%) | $\tau_2$ (ns) | $f_2$ (%) | Average $\tau$ (ns) |
|--------|---------------|---------------|-----------|---------------|-----------|---------------------|
| Before | 254           | 1.41          | 22.45     | 1.40          | 77.55     | 1.40                |
| After  | 254           | 0.65          | 42.21     | 0.78          | 57.79     | 0.73                |

**Table S2** Coloration and decoloration time of the composite film with different thickness.

| Thickness of the film<br>( $\mu\text{m}$ ) | Coloration time <sup>a</sup><br>(min) | Decoloration time <sup>b</sup><br>(min) |
|--------------------------------------------|---------------------------------------|-----------------------------------------|
| 29.94                                      | 6.1                                   | 9.6                                     |
| 42.67                                      | 4.0                                   | 16.2                                    |
| 78.79                                      | 3.4                                   | 43.9                                    |
| 121.01                                     | 3.1                                   | 91.8                                    |
| 159.88                                     | 2.9                                   | 172.4                                   |

<sup>a</sup> The composite films were irradiated upon 125 W high-pressure mercury lamp until the blue color can be observed.

<sup>b</sup> The coloration films (125 W high-pressure mercury lamp for 10 min) are exposed to 95% RH until the blue color bleached.
